# Supplementary material
Source: PubMed Central journal article supplement (PMC6295249)
Supplement: NIHMS1508049-supplement-3.pdf [file NIHMS1508049-supplement-3.pdf]

Supplementary Fig. S3

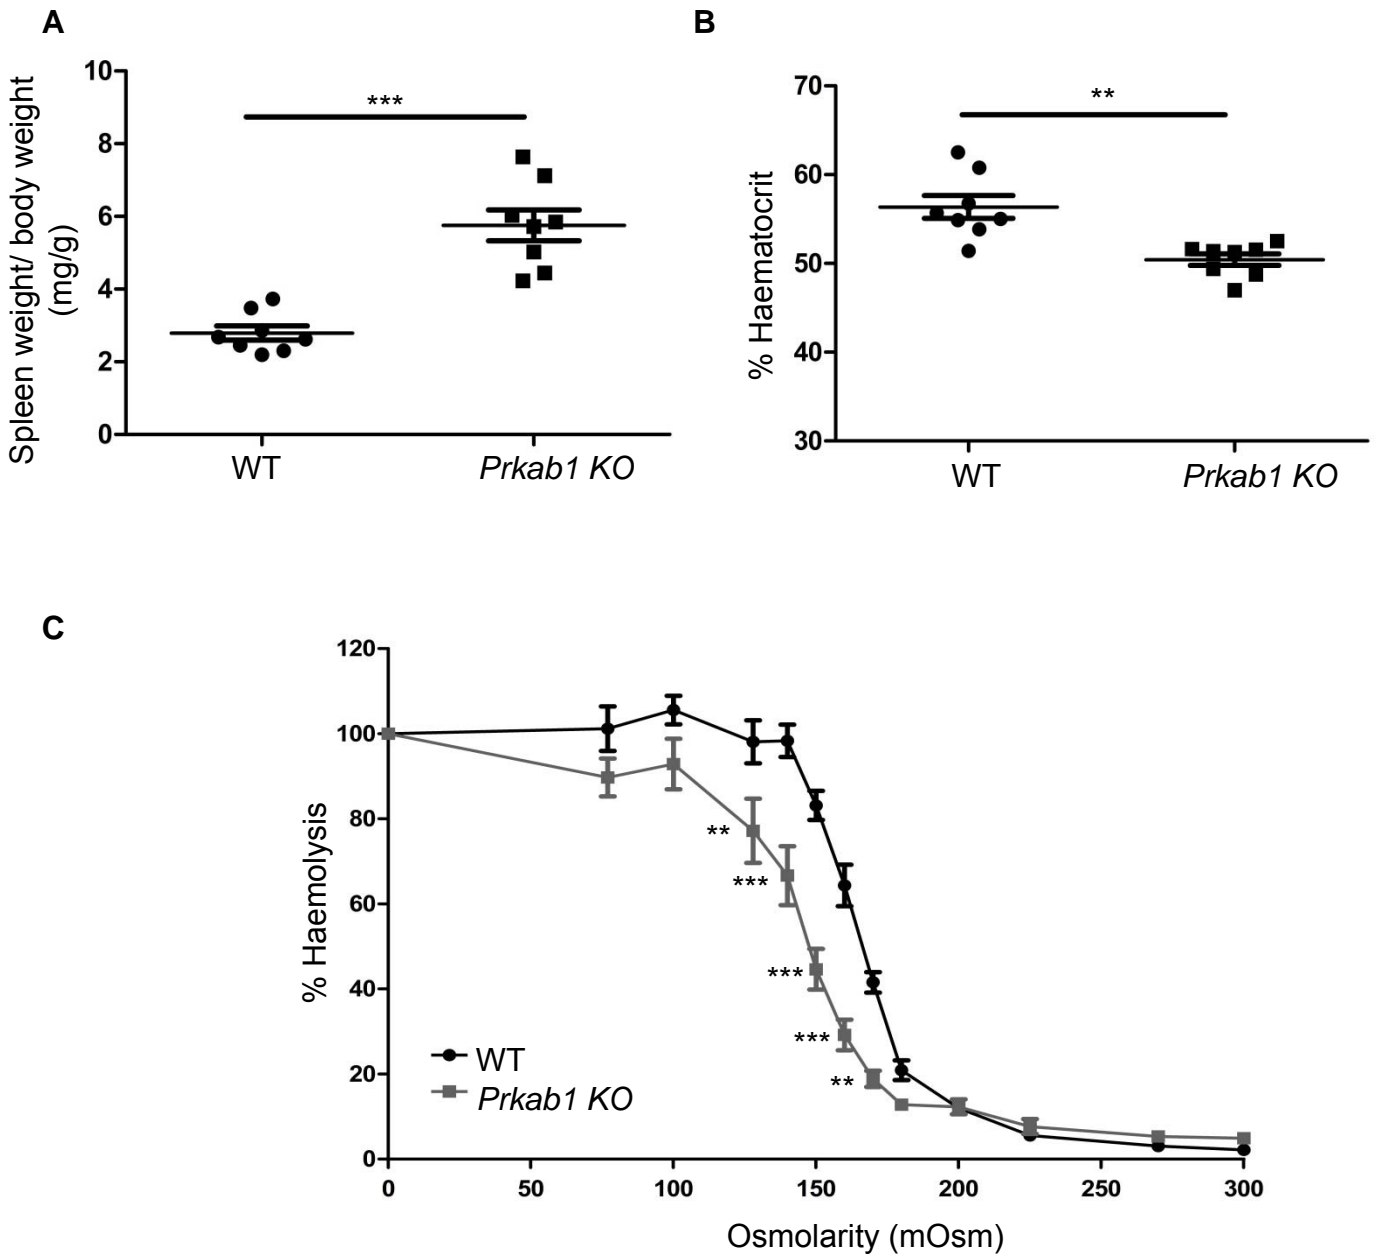

**Supplementary Figure S3. Spleen weight, haematocrit and erythrocyte osmotic resistance in wild-type (WT) and global *Prkab1* KO mice.** (A) Spleen weight normalised to body weight from wild-type (WT) and global *Prkab1* KO mice. (B) A representative image of spleens dissected from WT and *Prkab1* mice aged 17 weeks. (C) Haematocrit (percentage volume of erythrocytes in blood) for WT and *Prkab1* KO samples. (D) Equal numbers of erythrocytes were mixed with sodium chloride solutions at the indicated osmolarity and incubated for 45 minutes at room temperature. After centrifugation at 2000 x g for 5 minutes, the absorbance of the supernatant was determined at 540 nm. Erythrocyte osmotic resistance as determined by percentage haemolysis for WT and *Prkab1* mice. The absorbance at 540 nm of each sample in water was taken as 100% haemolysis, and readings were normalised to this value. Mice were aged to 17-20 weeks before performing analyses. Data are means  $\pm$  SEM (n=8 per genotype). \*\*p<0.001, \*\*\*p<0.005.
