# Supplementary material
Source: PubMed Central journal article supplement (PMC6295249)
Supplement: NIHMS1508049-supplement-4.pdf [file NIHMS1508049-supplement-4.pdf]

Supplementary Fig. S4

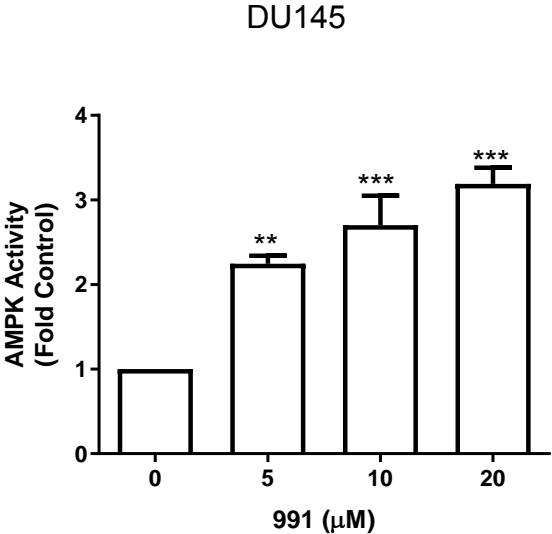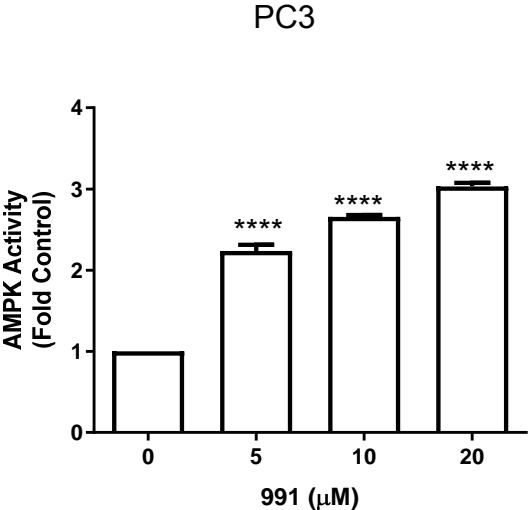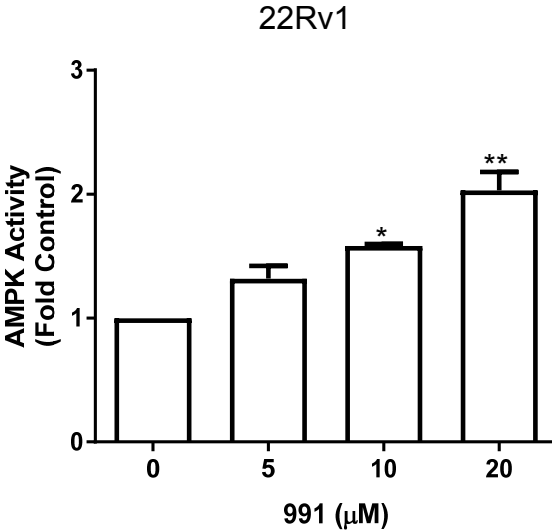

**Supplementary Figure S4. AMPK activity in human prostate cancer cell lines.** Cells were treated for 16 h with varying concentrations of 991 and AMPK activity in immune complexes was determined. Fold change relative to the activity in the absence of 991 is shown. Results are the mean  $\pm$ SEM from 3 independent experiments. Significant changes from control are shown \* $P$ <0.05, \*\* $P$ <0.01, \*\*\* $P$ <0.005, \*\*\*\* $P$ <0.0001.
