# Supplementary material
Source: PubMed Central journal article supplement (PMC6295249)
Supplement: NIHMS1508049-supplement-5.pdf [file NIHMS1508049-supplement-5.pdf]

Supplementary Fig. S5

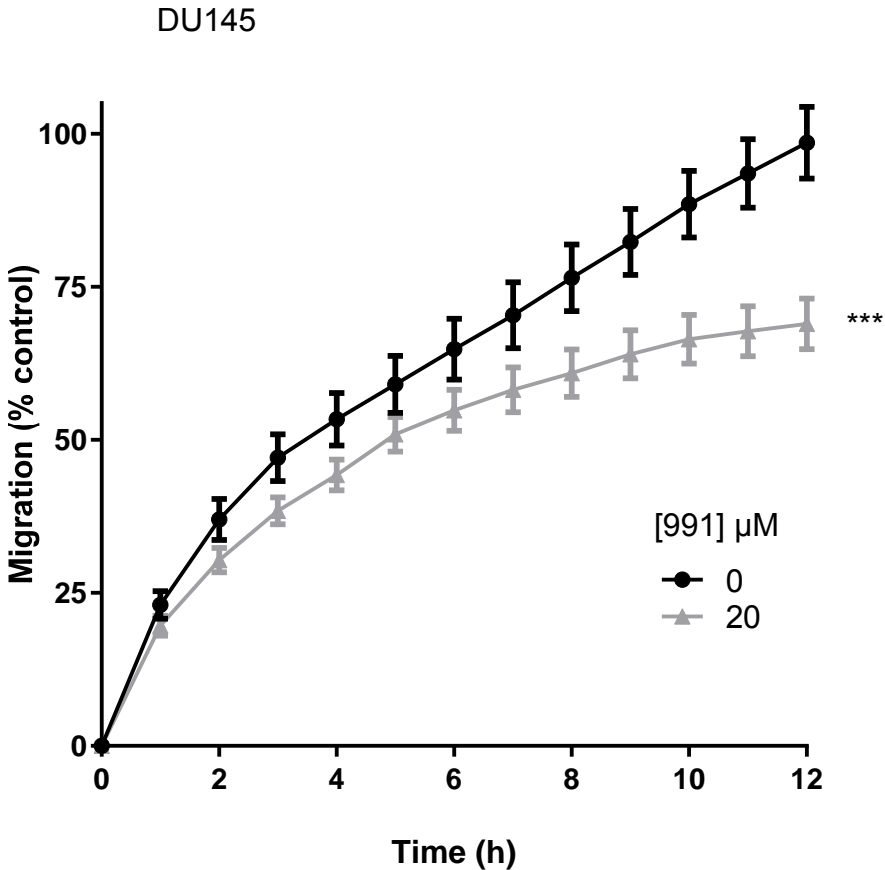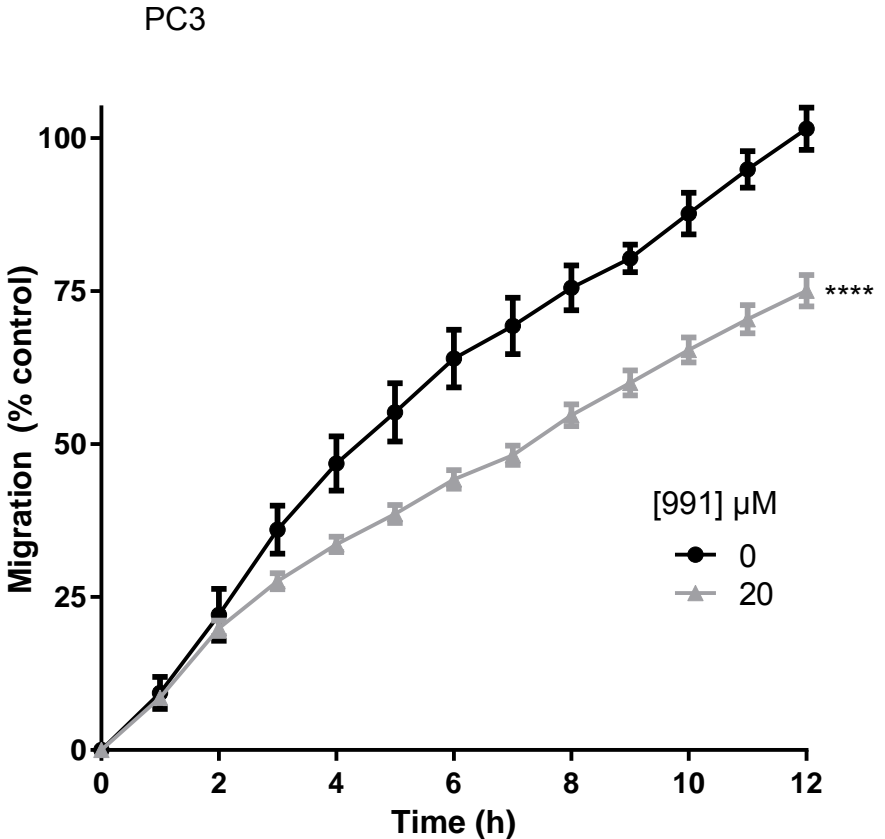

**Supplementary Figure S5.** Migration of DU145 and PC3 cells was measured over 12 h in a scratch assay in the absence or presence of 991 (20  $\mu$ M). Results are the mean  $\pm$ SEM from 3-5 independent experiments. Significant changes from control at 12 hours are shown \*\*\* $P$ <0.005, \*\*\*\* $P$ <0.0001.
