# Supplementary material
Source: PubMed Central journal article supplement (PMC6295249)
Supplement: NIHMS1508049-supplement-6.pdf [file NIHMS1508049-supplement-6.pdf]

**Supplementary Table 1. List of primers used for quantitative PCR.**

| Gene                | Forward Primer           | Reverse Primer           |
|---------------------|--------------------------|--------------------------|
| <i>36B4 (RPLP0)</i> | GGACATGTTGCTGGCCAATAA    | GGCCCCGAGACCAGTGTT       |
| <i>CAMKK2</i>       | TCCAGACCAGCCCGACATAG     | CAGGGGTGCAGCTTGATTC      |
| <i>FKBP5</i>        | ATTATCCGGAGAACCAAACG     | CAAACATCCTCCCACCACAG     |
| <i>PSA</i>          | AGGAGTTCTTGACCCCAAAGAAAC | TTGCGCACACACGTCATTG      |
| <i>TMPRSS2</i>      | GCGGCTGTCACGATCC         | GCGGCTGTCACGATCC         |
|                     |                          |                          |
| <i>Acaca (Acc1)</i> | ATGGGCGGAATGGTCTCTTTC    | TGGGGACCTTGTCTTCATCAT    |
| <i>Camkk2</i>       | GGAGGACGAGAACTGCACAC     | TTCGCTGCCTTGCTTCGTGA     |
| <i>Fasn</i>         | TGCTCCCAGCTGCAGGC        | GCCCGGTAGCTCTGGGTGTA     |
| <i>Hmbs</i>         | CTGGGCTCCTCTTGGAATG      | GATGGGCAACTGTACCTGACTG   |
| <i>Ppia</i>         | CAAATGCTGGACCAAACACAAACG | G TTCATGCCTTCTTTACCTTCCC |
| <i>Rps14</i>        | GACCAAGACCCCTGGACCT      | CCCCTTTTCTTCGAGTGCTA     |

Human gene names are in capitals, mouse genes in lowercase. Common aliases are shown in parentheses.
